# Supplementary material
Source: publisher figshare collection journal article supplement (https://acs.figshare.com/ndownloader/files/35116512)
Supplement: Supplementary file 1 [file 35116512]

## Supporting Information

# Heterogenization of Phosphotungstate Clusters into Magnetic-Microspheres: Catalyst for Selective Oxidation of Alcohol in Water

*Rakesh Chilivery,<sup>†,‡</sup> Vahinipathi Chaitanya,<sup>†,‡</sup> Jayadev Nayak,<sup>†,‡</sup> Sameer Seth,<sup>†,‡</sup>*

*Rohit K Rana\*<sup>†,‡</sup>*

Email address of the Corresponding Author (Rohit K. Rana): rkrana@iict.res.in

<sup>†</sup> Nanomaterials Laboratory, Department of Catalysis & Fine Chemicals, CSIR-Indian  
Institute of Chemical Technology, Hyderabad-500007, India

<sup>‡</sup> Academy of Scientific and Innovative Research (AcSIR), Ghaziabad-201002, India

**Number of pages: 27**

**Number of Figures: 15**

**Number of Tables: 7**

## Experimental Procedure

### *Materials:*

Poly(allylamine hydrochloride) (PAH, 15 kDa; 1Da = 1g mol<sup>-1</sup>), citric acid, trisodium citrate, ferric chloride and ferrous chloride, sodium hydroxide, phosphotungstic acid (H<sub>3</sub>PW<sub>12</sub>O<sub>40</sub>.xH<sub>2</sub>O)(PTA), Alcohols, hydrogen peroxide (30% H<sub>2</sub>O<sub>2</sub>) were procured from Sigma–Aldrich and used as received. In all cases, Millipore water (18.2 MΩ) was used to prepare the solutions

### *Preparation of citrate capped iron oxide nanoparticles (cit@Fe<sub>3</sub>O<sub>4</sub>):*

Citrate capped ferrite nanoparticles were synthesized using the method based on co-precipitation of Fe<sup>2+</sup> and Fe<sup>3+</sup> from respective salts. Typically, under nitrogen atmosphere, 100 mL sodium hydroxide (10 M) was added in to a mixture of iron chloride salts with Fe<sup>2+</sup>/Fe<sup>3+</sup> molar ratio of 1:2 forming an immediate dark brown/black suspension. The solution was stirred for 1 h at room temperature and heated at 90°C for 1h, which resulted in the formation of a brown colloidal solution of ferrite. Then, 100 mL of trisodium citrate (0.3 M) was added and stirred for another 30 min. Subsequently, thus obtained citrate-capped iron oxide dispersion was cooled down to room temperature under continuous stirring, followed by the addition of an excess amount of acetone to precipitate the magnetic particles. The magnetic particles were washed 3-4 times with deionised water and collected with the help of an external magnet. Finally, the magnetically collected nanoparticles were washed with ethyl acetate and dried at room temperature and stored for further studies. The hydrodynamic sizes of these are in the range of 45 nm as determined from DLS.

### *Preparation of PTA-assembled magnetic microcapsules (PTA@MMS):*

In a typical synthesis, an aqueous solution of PAH (2 mL, 2 mg mL<sup>-1</sup>) was vortex mixed for 10s with citrate-functionalized Fe<sub>3</sub>O<sub>4</sub> (2 mg mL<sup>-1</sup>) dispersed in an aqueous solution of citrate

[28.52 mM, 2.5 mL] while keeping the charge ratio ( $R$  = total negative charge on citrate to the total positive charge on the PAH) maintained at 5. Thus formed PAH-citrate aggregates resulted in a cloudy brown suspension, which was further allowed to age for 15 min and then mixed with an aqueous solution of PTA (11.4 mM, 2.5 mL). After ageing for another 15 min the resultant precipitate (PTA@MMS) was then collected through an external magnet and further washed for 3-4 times with Millipore water to remove the unreacted reagents. Thus synthesized PTA@MMS were dried at room temperature and then used further for characterization and catalytic applications.

#### Catalytic oxidation of alcohols:

In a typical reaction, oxidation of alcohols was carried out in a 50 mL two necked round bottom flask by addition of benzyl alcohol (1 mmol), oxidants (30wt %  $H_2O_2$  (1.5 mmol) and 20 mg of catalyst (comprises 5  $\mu$ mol PTA) in water solvent (6 mL) under stirring at the required temperature (90°C). The products were extracted with toluene at different intervals and analysed by using gas chromatography (GC) equipped with ZB-5 column and FID detector. The catalyst was isolated from the reaction mixture with help of an external magnet and washed several times with ethanol and water. The separated catalyst was further used in the reaction under similar conditions in order to assess its reusability.

#### Characterization

Optical microscopic study of the samples was done with a Leica DM4000 M LED. Field emission scanning electron microscopic (FESEM) analysis was carried out using high resolution Schottky Field Emission Scanning Electron Microscope (JEOL-7610F) furnished with an energy dispersive X-ray spectrometer (AZTEC EDS, Oxford Instruments). High resolution transmission electron microscopy (HRTEM), high-angle annular dark field scanning transmission electron microscopy (HAADF-STEM) and EDS were done with a FEI

Talos F 200x microscopes (FEI, Hillsboro, Oregon USA) operated at 200 kV equipped with HAADF and Super-X EDS detectors. The samples for TEM were prepared by dispersing the material in ethanol by ultra sonication and then drop-drying onto a formvar-coated copper grid. Dynamic light scattering (DLS) technique (Malvern Zetasizer, Nano ZS) was used for the measurement of average hydrodynamic size and zeta potential of the materials. FT-IR spectra were recorded at 4000–400  $\text{cm}^{-1}$  on a Bruker Alpha spectrometer. Confocal micro Raman spectra were recorded using a Horiba Jobin-Yvon Lab Ram HR spectrometer equipped with a 30 mW He-Ne laser source at 633 nm wavelength with a 10% filter. X-ray diffraction patterns of the synthesized MMSs were collected on a PANalytical Empyrean equipped with Pixel 3D detector.  $^{31}\text{P}$  NMR recorded on AVANCE III-500WB, Bruker instrument operating at 202 MHz, with a 3.2 mm triple resonance (HXY) solid state probe. The measurement was carried at room temperature using 85%  $\text{H}_3\text{PO}_4$  as standard reference. UV-Diffused reflectance spectra were recorded on a UV-vis spectrophotometer (Carry-5000). Magnetic properties of the samples were evaluated using ADE-EV9 vibrating sample magnetometer (VSM).  $\text{N}_2$  physisorption measurements were done with Quanta chrome Nova-4000e system, for which the samples were degassed at 90°C for 2 h prior to the measurements. Thermogravimetric analysis (TGA) was performed with a TA Q50 thermogravimetric analyzer in the temperature range of 35 - 800°C with a heating rate 10°C/min under nitrogen atmosphere. For the catalytic test, the reaction progress was monitored by gas chromatography (GC-2010, SHIMADZU) using ZB-5 column and FID detector. Elemental analysis was carried out by Inductively Couple Plasma-Optical Emission Spectroscopy (ICP-OES), Thermo Elemental, IRIS Intrepid II XDL.

**Table S1.**  $\zeta$  potential and hydrodynamic diameter obtained from DLS measurements for cit@Fe<sub>3</sub>O<sub>4</sub> nanoparticles, PAH-cit-Fe<sub>3</sub>O<sub>4</sub> aggregates, and PTA@MMS at various steps of the assembly process

| Measurement            | citrate@Fe <sub>3</sub> O <sub>4</sub><br>nanoparticles | PAH-cit- Fe <sub>3</sub> O <sub>4</sub><br>aggregates | PTA@MMS |
|------------------------|---------------------------------------------------------|-------------------------------------------------------|---------|
| $\zeta$ Potential (mV) | -34.8                                                   | +23                                                   | -38     |
| Average Size (nm)      | 10.30                                                   | 92.58                                                 | 300     |

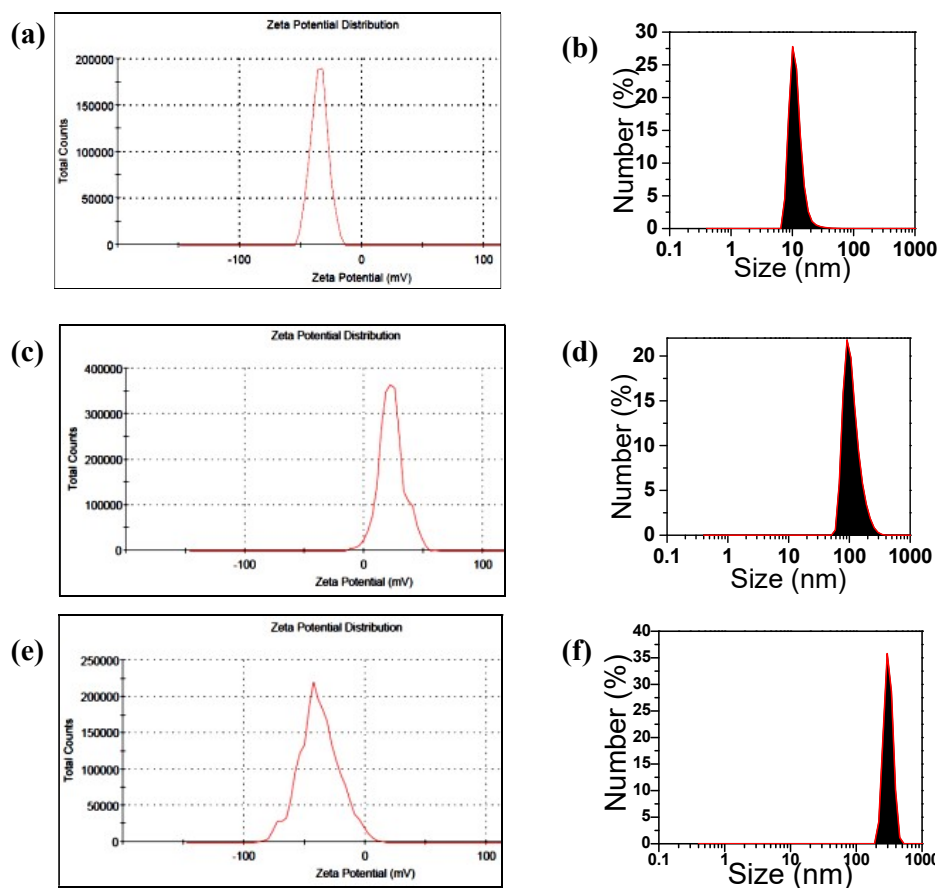

**Figure S1.** DLS analyses results obtained using the assembly process: Zeta potential (a, c, e) and hydrodynamic size-distribution plots (b, d, f) for cit@Fe<sub>3</sub>O<sub>4</sub> nanoparticles, PAH-cit-Fe<sub>3</sub>O<sub>4</sub> aggregates and PTA@MMS samples, respectively.

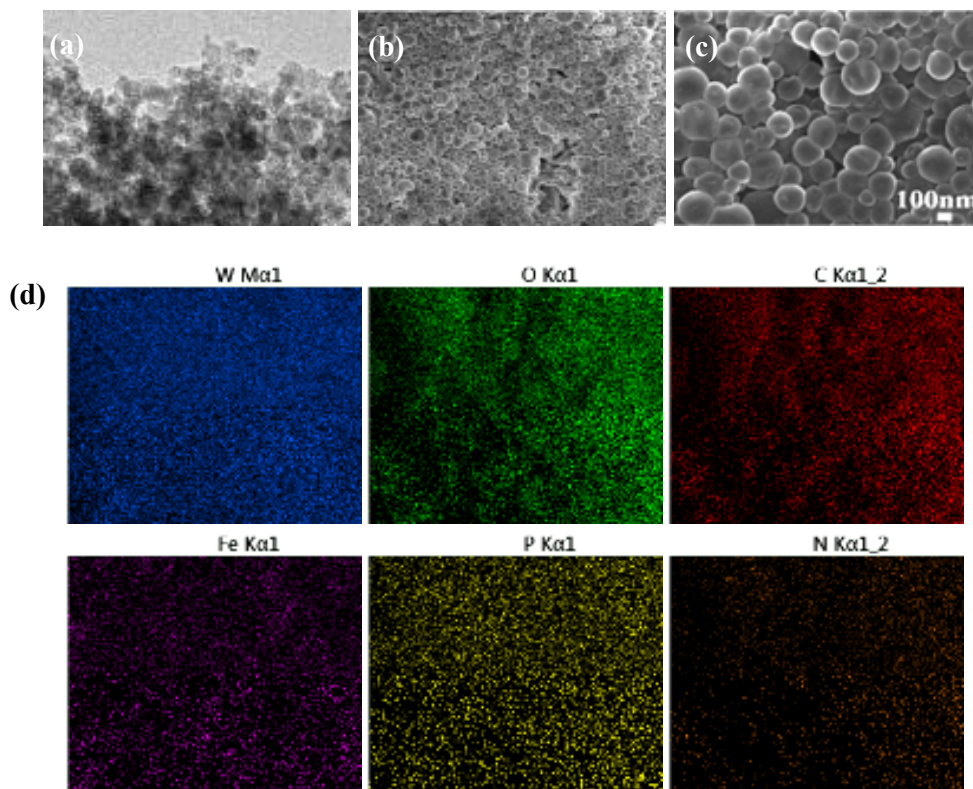

**Figure S2.** a) TEM image of cit@Fe<sub>3</sub>O<sub>4</sub> nanoparticles; (b, c) Low and higher magnification FESEM images of PTA@MMS; d) EDS elemental mapping for PTA@MMS sample.

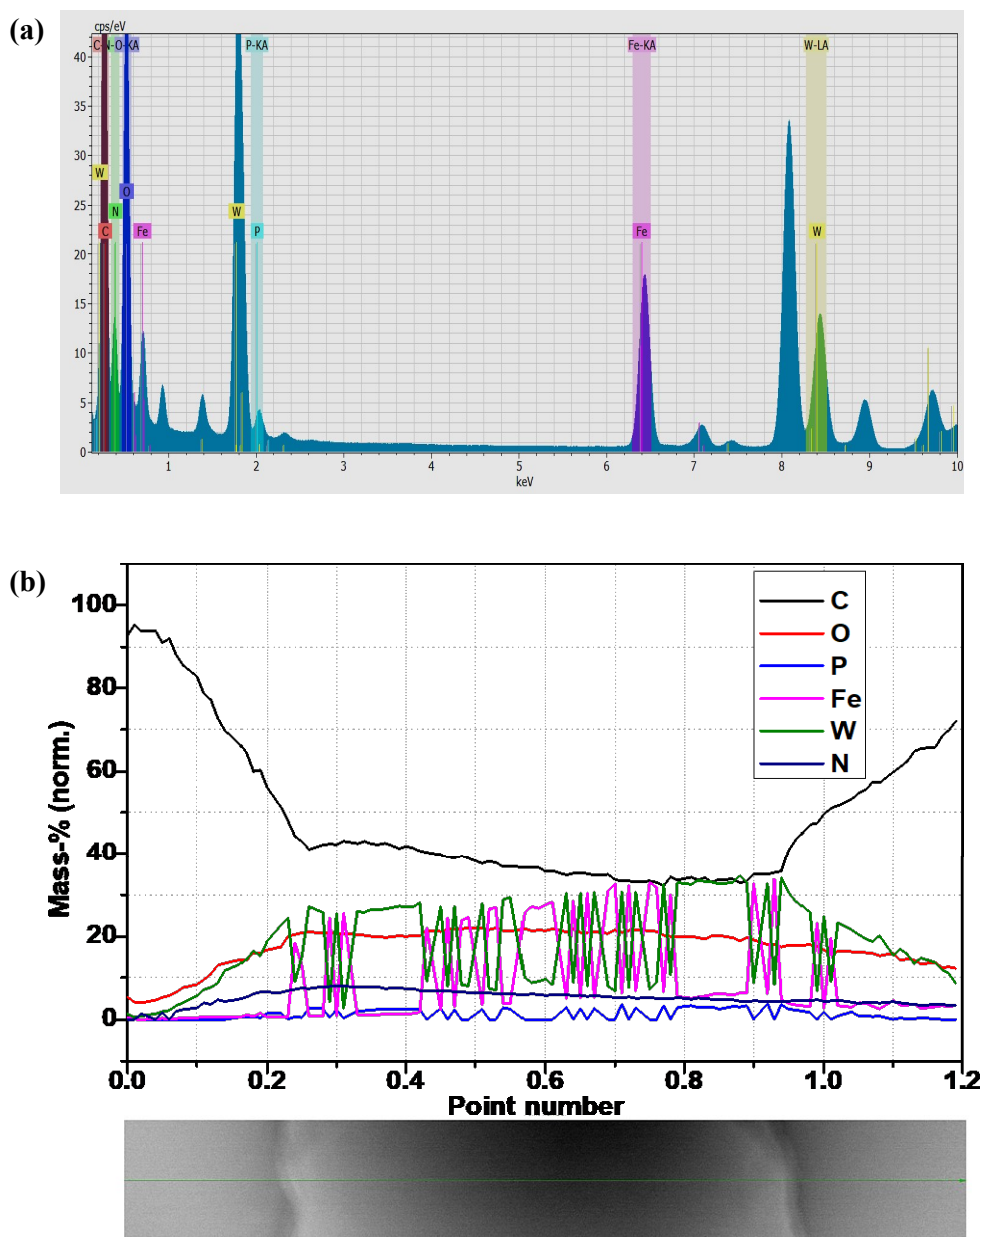

**Figure S3.** HAADF-STEM EDS analysis of PTA@MMS. a) EDS spectrum; b) EDS line-scan (top part) for various elements present in a sphere of PTA@MMS as shown in the HAADF-STEM image (bottom part).



**Table S2.** Confocal micro-Raman modes of PTA, PAH, cit@Fe<sub>3</sub>O<sub>4</sub>, PTA@MMS and recycled PTA@MMS samples

| Sample                                   | Wavenumber (cm <sup>-1</sup> )                   | Assignment                                                                                                                                                                        |
|------------------------------------------|--------------------------------------------------|-----------------------------------------------------------------------------------------------------------------------------------------------------------------------------------|
| PTA                                      | 1008 (984),<br>905,<br>524,<br>216               | W-O <sub>d</sub> (terminal),<br>W-O <sub>b</sub> -W,<br>W-O <sub>c</sub> -W (bridging),<br>W-O-W bending mode of vibration                                                        |
| PAH                                      | 2924                                             | C-H stretching vibrations                                                                                                                                                         |
| cit@Fe <sub>3</sub> O <sub>4</sub>       | 672, 488, 360                                    | Characteristic Raman modes for Fe <sub>3</sub> O <sub>4</sub> <sup>SI</sup>                                                                                                       |
| PTA@MMS<br>(Fresh and recycled catalyst) | 975 (937),<br>858,<br>511,<br>208<br>2924<br>599 | W-O <sub>d</sub> (terminal),<br>W-O <sub>b</sub> -W,<br>W-O <sub>c</sub> -W (bridging),<br>W-O-W bending mode of vibration<br>C-H stretching vibrations in PAH<br>Fe-O stretching |

\* O<sub>b</sub> represents the bridged oxygen of two octahedra sharing a corner; O<sub>c</sub> is the bridged oxygen sharing an edge; and O<sub>d</sub> is the terminal oxygen.

**Table S3.** FT-IR vibrational peak assignments for PTA, PAH, cit@Fe<sub>3</sub>O<sub>4</sub>, PTA@MMS and recycled PTA@MMS samples

| Sample                                   | Wave number (cm <sup>-1</sup> ) | Assignment                                                                     |
|------------------------------------------|---------------------------------|--------------------------------------------------------------------------------|
| PTA                                      | 1078, 984, 895, and 798         | P-O <sub>a</sub> , W-O <sub>d</sub> , W-O <sub>b</sub> -W, W-O <sub>c</sub> -W |
| PTA@MMS<br>(Fresh and recycled catalyst) | 1076, 951, 881, and 790         | P-O <sub>a</sub> , W-O <sub>d</sub> , W-O <sub>b</sub> -W, W-O <sub>c</sub> -W |
|                                          | 3428, 3095                      | -N-H stretching vibrations                                                     |
|                                          | 1626, 1510                      | -NH <sub>2</sub> , -NH <sub>3</sub> <sup>+</sup> bending modes in PAH          |
|                                          | 2924                            | C-H stretching vibrations in PAH                                               |
|                                          | 1720                            | C=O stretching vibration in citrate                                            |
|                                          | 596                             | Fe-O stretching in Fe <sub>3</sub> O <sub>4</sub>                              |
| PAH                                      | 2924                            | C-H stretching vibrations                                                      |
| cit@Fe <sub>3</sub> O <sub>4</sub>       | 596                             | Fe-O stretching                                                                |
|                                          | 1720                            | C=O stretching vibration                                                       |

\* O<sub>a</sub> is the oxygen of the central tetrahedron; O<sub>b</sub> is the bridged oxygen of two octahedra sharing a corner; O<sub>c</sub> is the bridged oxygen sharing an edge; and O<sub>d</sub> is the terminal oxygen.

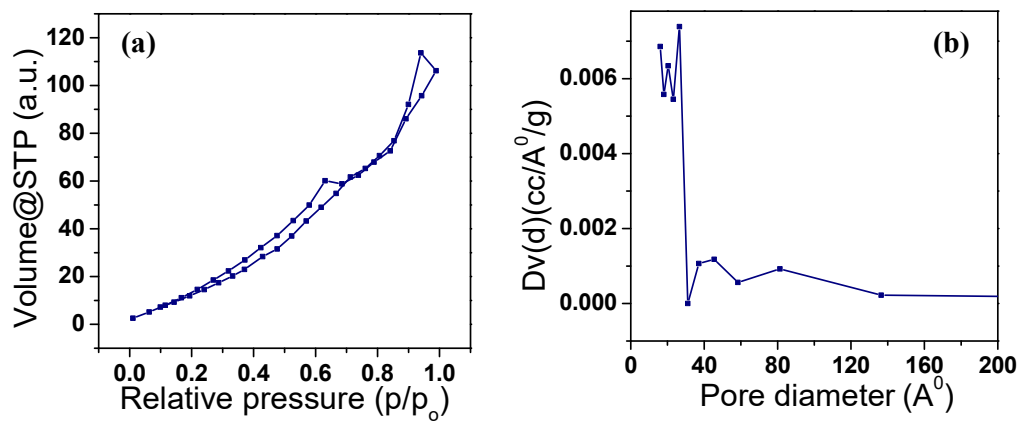

**Figure S4.** (a)  $N_2$  adsorption-desorption isotherm, and (b) Pore-size distribution curve obtained from the  $N_2$ -sorption analysis of PTA@MMS.

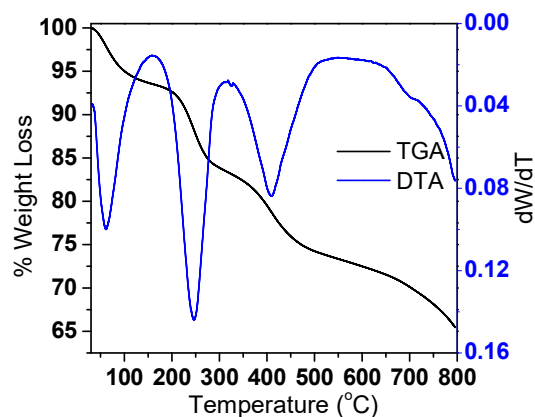

**Figure S5.** TG-DTA thermogram of PTA@MMS. The weight-loss of 8.0 Wt. % below 150 °C and 20 Wt.% within 250 – 550 °C are due to the loss of water molecules (adsorbed and crystalline), and the decomposition of organic contents, respectively. The ~3 Wt.% weight-loss in 600-700°C is due to the decomposition PTA to  $P_2O_5$ , which corresponds to ~57 Wt.%  $WO_3$  (equivalent to ~64 Wt% PTA) in PTA@MMS and the remaining ~12 Wt.% is for  $Fe_3O_4$ . Note: The weight-loss above 700°C indicates the gradual but incomplete reduction of  $Fe_3O_4$ .<sup>S2</sup>

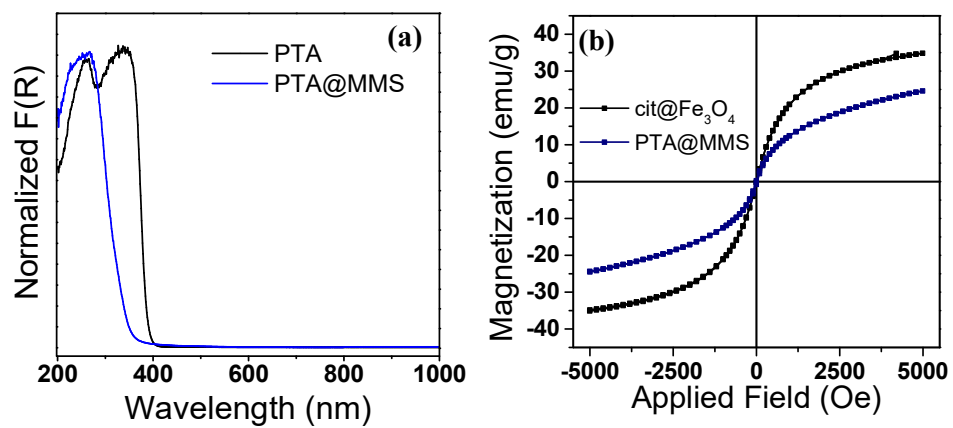

**Figure S6.** a) UV-Vis Diffuse reflectance spectra of PTA and PTA@MMS, and b) Vibrating sample magnetometer analysis of cit@Fe<sub>3</sub>O<sub>4</sub> and PTA@MMS.

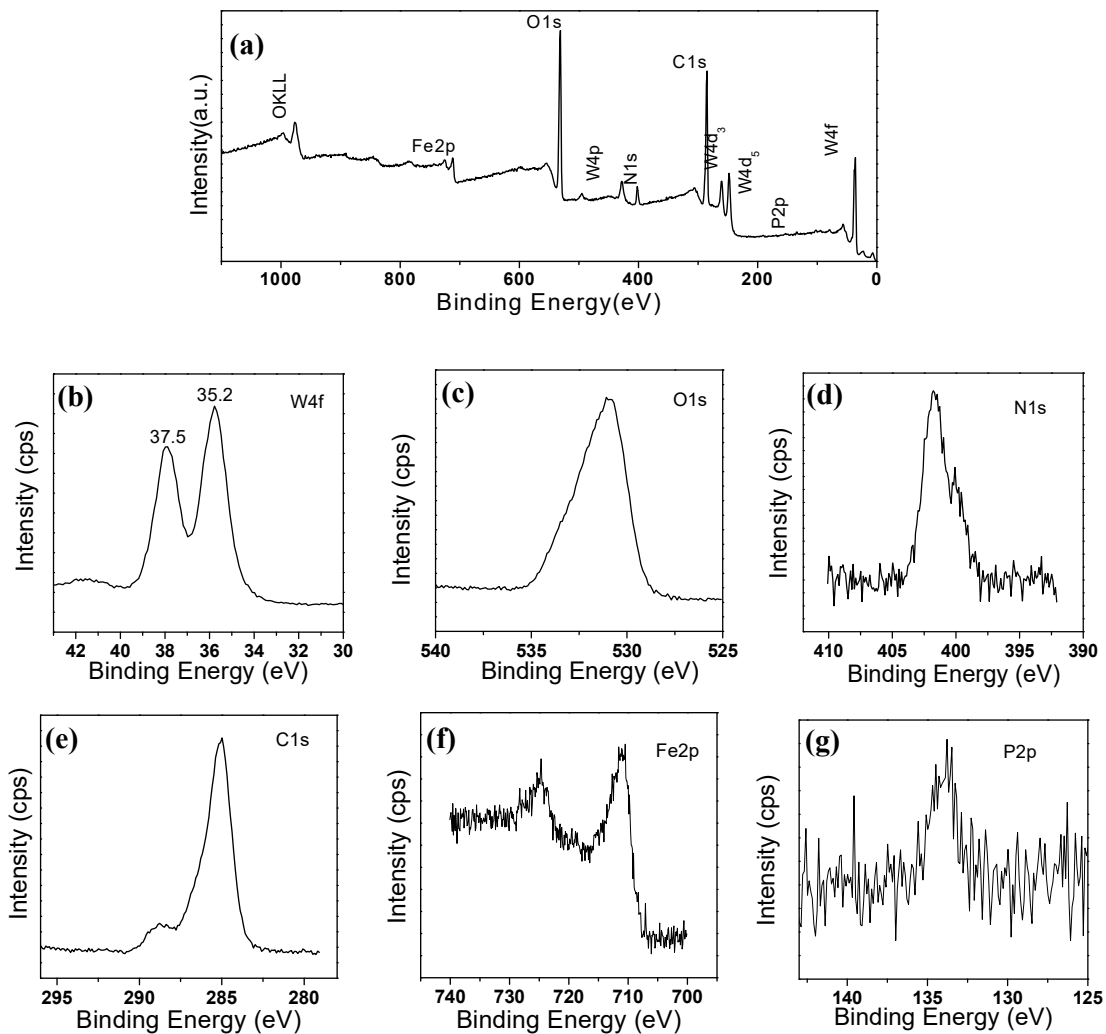

**Figure S7.** X-ray photoelectron spectra obtained for PTA@MMS: (a) Survey spectrum showing the characteristic peaks of C, N, Fe, W, P and O; Core level spectra for b) W4f, c) O1s, d) N1s, e) C1s, and f) P2p.

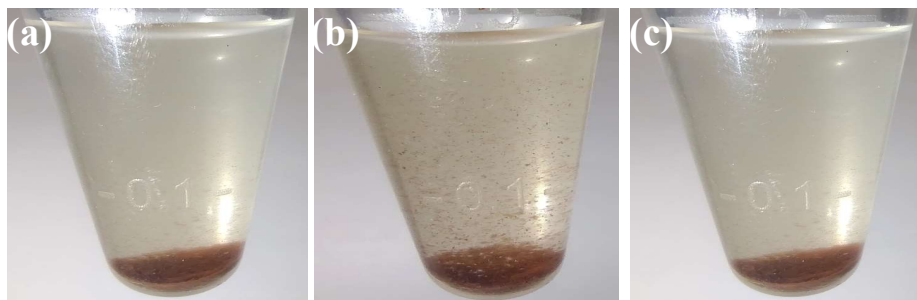

**Figure S8.** Photographic images of the reaction mixture used in benzyl alcohol oxidation in the presence of PTA@MMS as catalyst: a) Reaction mixture of  $\text{CH}_3\text{CN}$ , benzyl alcohol and PTA@MMS (settled at the bottom) before reaction; b) During the reaction; c) After the reaction (biphasic)

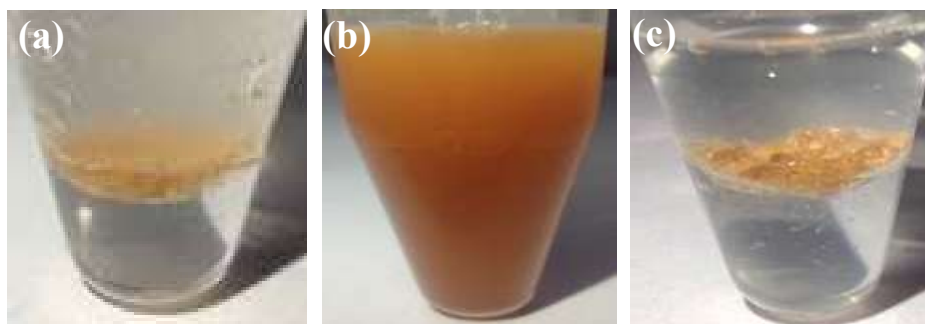

**Figure S9.** Photographic images of the reaction mixture used in benzyl alcohol oxidation in the presence of PTA@MMS as catalyst: a) Reaction mixture of water (bottom layer), benzyl alcohol (upper layer) and PTA@MMS (at the interface) before reaction; b) During the reaction; c) After the reaction (triphasic)

**Table S4.** Change in catalytic activity with variation in the amount of PTA@MMS catalyst in the oxidation of benzyl alcohol

| Amount (mg) | Conversion (%) | Selectivity (%) |
|-------------|----------------|-----------------|
| 15          | 63.21          | 96              |
| 20          | 66.75          | 95.23           |
| 25          | 97.04          | 97.2            |
| 30          | 85.32          | 96.2            |

Conditions: BzOH- 1.0 mmol, H<sub>2</sub>O<sub>2</sub> -1.5 mmol, 6 mL water, 90°C, 15 h



**Table S5.** Change in catalytic activity with variation in the concentration of the substrate (benzyl alcohol) in its oxidation over PTA@MMS catalyst

| <b>Benzyl alcohol (mmol)</b> | <b>Conversion (%)</b> | <b>Selectivity (%)</b> |
|------------------------------|-----------------------|------------------------|
| 0.2                          | 51                    | 99                     |
| 1.0                          | 97.04                 | 97.2                   |
| 5.0                          | 69.45                 | 88.4                   |

Conditions: H<sub>2</sub>O<sub>2</sub> -1.5 mmol, PTA ~5.0  $\mu$ mol, 6 mL water, 90°C, 15 h

**Proposed Mechanism:**

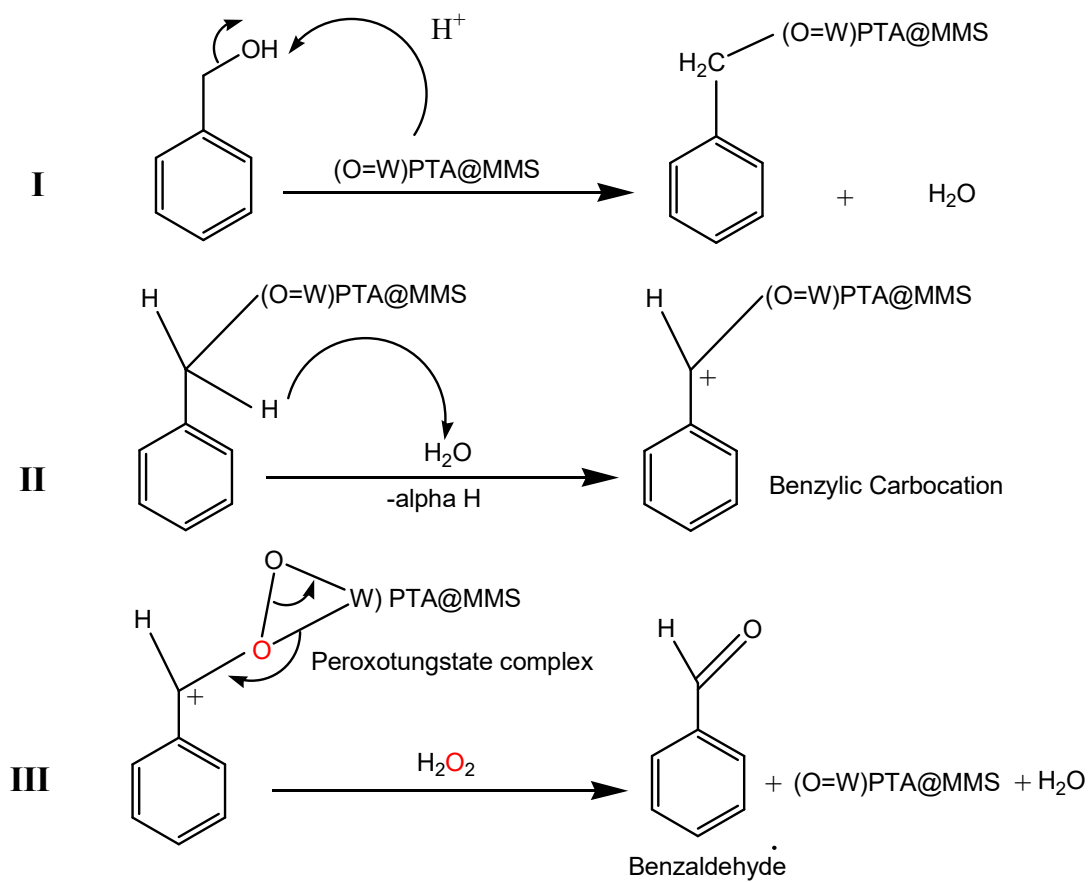

**Figure S10.** Schematic illustration of the plausible pathway for the oxidation of benzyl alcohol in the presence of PTA@MMS as catalyst.

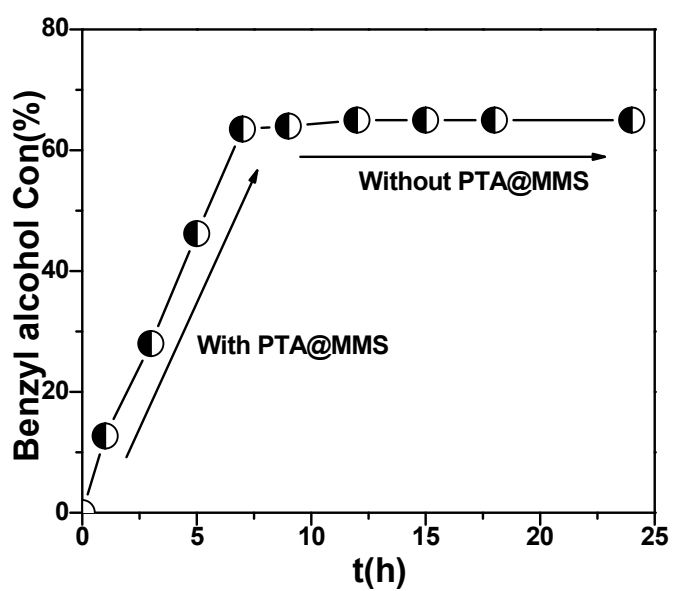

**Figure S11.** Plot of benzyl alcohol conversion with time in the presence of the PTA@MMS catalyst and after the catalyst is separated via hot-filtration from the reaction mixture during the catalytic reaction. (Reaction conditions: BzOH- 1.0 mmol, H<sub>2</sub>O<sub>2</sub> -1.5 mmol, 6 mL water, 90°C, 15 h).

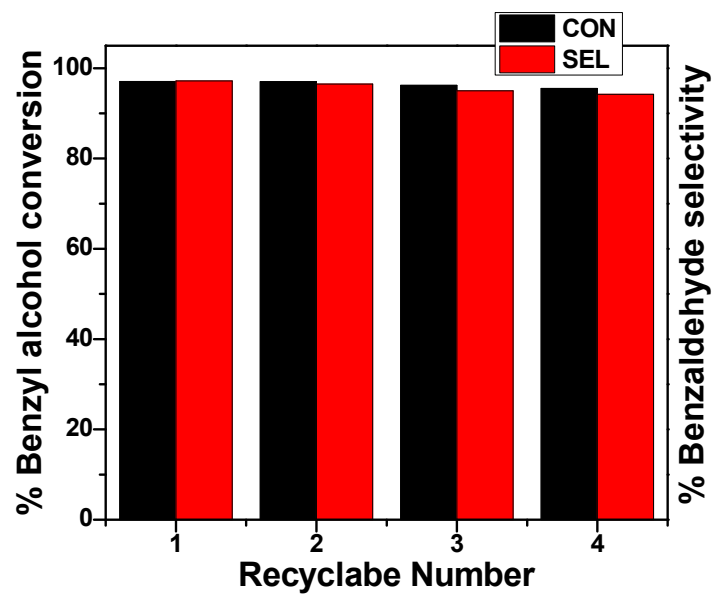

**Figure S12.** Catalytic activity and selectivity observed in the reusability test of PTA@MMS catalyst in the oxidation of benzyl alcohol reaction. (Reaction conditions: BzOH- 1.0 mmol, H<sub>2</sub>O<sub>2</sub> -1.5 mmol, 6 mL water, 90°C, 15 h)

**Table S6:** The amount of Tungsten (determined by ICP-OES of the solution diluted to 25 mL) present in the reaction mixture after the PTA@MMS catalyst is separated from the reactor via hot-filtration during different reaction cycles of benzyl alcohol oxidation. (Reaction conditions: 1.0 mmol BzOH, 1.5 mmol H<sub>2</sub>O<sub>2</sub>, 6 mL water, 90°C, 15 h)

| Catalyst              | Concentration of W present in the reaction mixture (ppm) | Loss in W amount (%) |
|-----------------------|----------------------------------------------------------|----------------------|
| 1 <sup>st</sup> Cycle | 2.3±0.1                                                  | 0.130                |
| 2 <sup>nd</sup> Cycle | 1.93±0.1                                                 | 0.110                |
| 3 <sup>rd</sup> Cycle | 0.61±0.1                                                 | 0.034                |
| 4 <sup>th</sup> Cycle | 0.12±0.1                                                 | 0.007                |

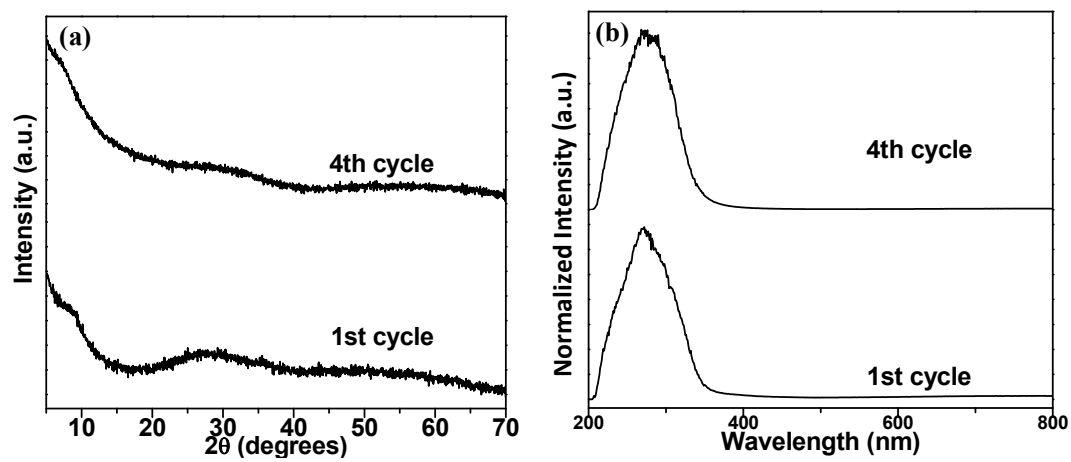

**Figure S13.** a) XRD pattern; b) UV-vis DRS spectra of the recycled PTA@MMS catalyst used at various reaction cycles for the oxidation of benzyl alcohol reaction.

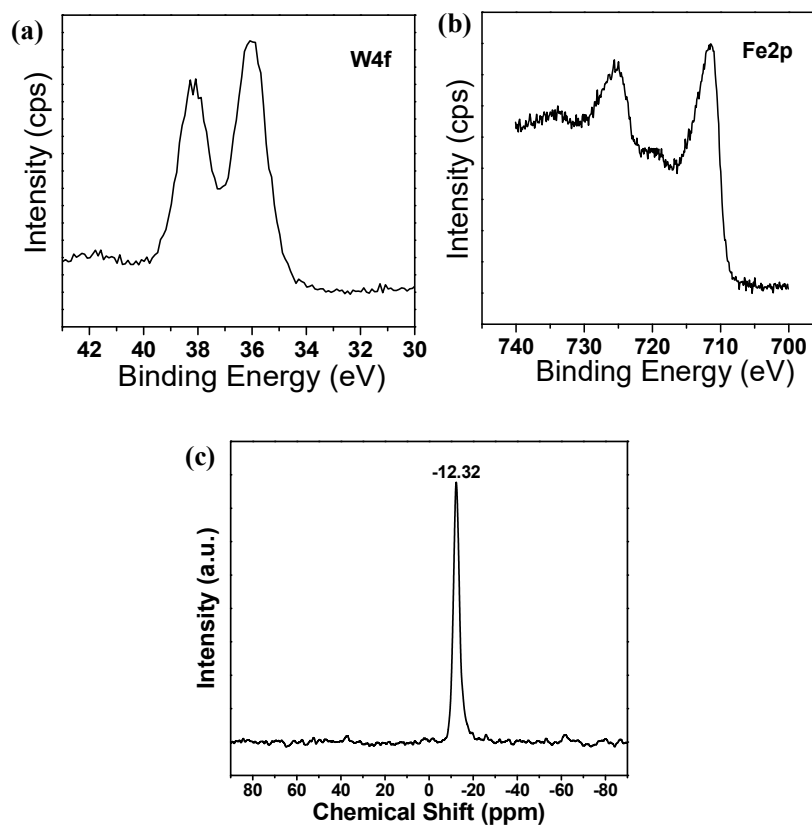

**Figure S14.** XPS core level spectra of (a) W4f, and (b) Fe 2p; c)  $^{31}\text{P}$  NMR spectrum of the recycled PTA@MMS catalyst in the oxidation of benzyl alcohol reaction.

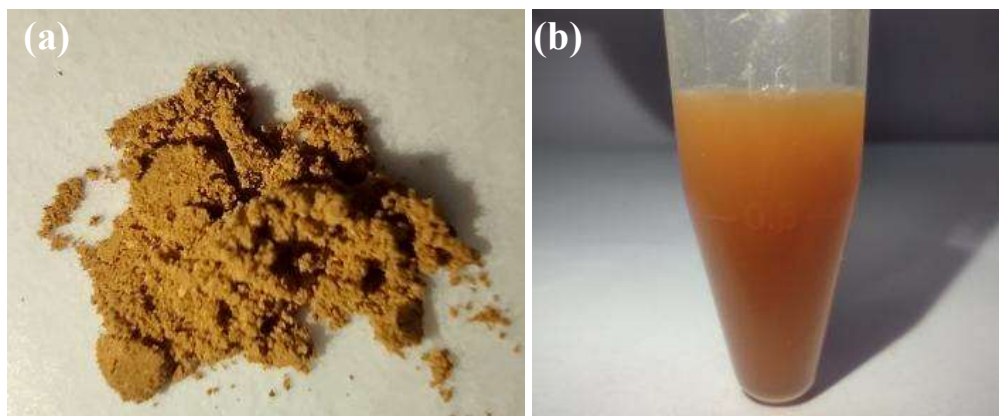

**Figure S15.** Photographic images of a) dried sample of PTA@MMS, and b) an aqueous suspension of PTA@MMS.



**Table S7.** Comparison of the catalytic activities of PTA@MMS with other reported phosphotungstate-based catalysts for benzyl alcohol (BzOH) oxidation with H<sub>2</sub>O<sub>2</sub>

| S.N | Catalyst                                                                                             | Reaction conditions                                                                                                                                             | BzOH Oxidation* |             | *TON         | Ref.             |
|-----|------------------------------------------------------------------------------------------------------|-----------------------------------------------------------------------------------------------------------------------------------------------------------------|-----------------|-------------|--------------|------------------|
|     |                                                                                                      |                                                                                                                                                                 | Con %           | Sel %       |              |                  |
| 1   | PIPA-n                                                                                               | Alcohol 10 mmol, 15 mmol (30%) H <sub>2</sub> O <sub>2</sub> , 1.3 mol% catalyst, 95 °C, water (1.5 mL)                                                         | 96              | 86          | 73.84        | S3               |
| 2   | SiO <sub>2</sub> -BisILs[W <sub>2</sub> O <sub>3</sub> (O <sub>2</sub> ) <sub>4</sub> ]              | Alcohol (1 mmol), H <sub>2</sub> O <sub>2</sub> (1.4mmol), catalyst (1 mol%), 90°C, 18h, water (2mL)                                                            | 98              | 96          | 98.0         | S4               |
| 3   | GO/Fe <sub>3</sub> O <sub>4</sub> /HPW                                                               | Alcohol (1 mmol), catalyst (20 mg), H <sub>2</sub> O <sub>2</sub> (5 mmol), 70 °C.                                                                              | 99              | 100         | 142.6        | S5               |
| 4   | Fe <sub>3</sub> O <sub>4</sub> @SiO <sub>2</sub> /NH-PW <sub>10</sub> V <sub>2</sub> O <sub>40</sub> | Catalyst (20 mol%, 0.02 g), alcohol (1.0 mmol), H <sub>2</sub> O <sub>2</sub> (2 ml), toluene (2 ml), 80 °C                                                     | 98              | 99          | 141.2        | S6               |
| 5   | GO/Im-PW <sub>12</sub> O <sub>40</sub> <sup>3-</sup>                                                 | Catalyst (0.6 g), alcohol (40 mmol), H <sub>2</sub> O <sub>2</sub> (100 mmol), 90 °C                                                                            | 90              | 99          | 172.4        | S7               |
| 6   | PW11/MP                                                                                              | Alcohol 20mmol, H <sub>2</sub> O <sub>2</sub> (20mmol) catalyst PW11/MP 10 wt% w.r.t alcohol, 90 °C, 18 h. 6 ml of CH <sub>3</sub> CN                           | 94.2            | 69.8        | 188.4        | S8               |
| 7   | [TMGHA] <sub>2.4</sub> H <sub>0.6</sub> PW                                                           | Alcohol (10 mmol), 30 wt % H <sub>2</sub> O <sub>2</sub> (15 mmol), catalyst (0.03 mmol), 6 mL, water, 90 °C                                                    | 97.9            | 93.5        | 323.3        | S9               |
| 8   | PTA- Jeffamine                                                                                       | Catalyst (0.5 g), alcohol (1.9M), H <sub>2</sub> O <sub>2</sub> (3.9M), 90 °C                                                                                   | 100             | 59          | 10.98        | S10              |
| 9   | PW4/DAIL/MIL-100(Fe)                                                                                 | Alcohol (1 mmol), oxidant (4.5 mmol), TBHP/CHCl <sub>3</sub> , catalyst 6 μmol, 100 °C.                                                                         | 92              | 99          | 153.3        | S11              |
| 10  | [DEDSA] <sub>3</sub> PW <sub>12</sub> O <sub>40</sub>                                                | Alcohol (1 mmol), H <sub>2</sub> O <sub>2</sub> (3 mmol), [DEDSA] <sub>3</sub> PW <sub>12</sub> O <sub>40</sub> (3.5 mol%), CH <sub>3</sub> CN (2 mL), 65°C, 6h | 97.5            | 88.5        | 27.85        | S12              |
| 11  | [C4mim] <sub>4</sub> PMo <sub>11</sub> VO <sub>40</sub>                                              | Alcohol (30 mmol), 30 wt% H <sub>2</sub> O <sub>2</sub> (36 mmol), catalyst (100 mg), water (6 mL), 80°C                                                        | 34              | 99          | 186.0        | S13              |
| 12  | PW@IL-GO (1.5)                                                                                       | Alcohol (10 mmol), catalyst (0.15 mol%, (15.0 wt% H <sub>2</sub> O <sub>2</sub> ), water (5 mL), 100 °C                                                         | 94              | 91          | 626.0        | S14              |
| 13  | Im- PW/GO                                                                                            | Substrate 40 mmol, molar ratio of alcohol with H <sub>2</sub> O <sub>2</sub> = 1:2.5, catalyst 0.6 g, 90°C                                                      | 90.8            | 99.2        | 173.0        | S15              |
| 14  | <b>PTA@MMS</b>                                                                                       | BzOH- 1.0 mmol, H <sub>2</sub> O <sub>2</sub> -1.5 mmol, catalyst 5μmol, 6 mL water, 90°C                                                                       | <b>97.0</b>     | <b>97.2</b> | <b>194.0</b> | <b>This work</b> |

\* Sel (%) is with respect to Benzaldehyde, TON = moles of substrate conversion/moles of catalyst

## References:

- S1. Murugappan, K.; Silvester, D.S.; Chaudhary, D.; Arrigan, D.W.M. Electrochemical Characterization of an Oleyl-coated Magnetite Nanoparticle-Modified Electrode *CHEMELECTROCHEM*, 2014, **1**, 1211-1218. doi.org/10.1002/celc.201402012
- S2. Ayyappan, S.; Gnanaprakash, G.; Panneerselvam, G.; Antony, M.P.; Philip, J. Effect of Surfactant Monolayer on Reduction of Fe<sub>3</sub>O<sub>4</sub> Nanoparticles under Vacuum. *J. Phys. Chem. C* 2008, **112**, 18376–18383. doi.org/10.1021/jp8052899
- S3. Hao, P; Zhang, M; Zhang, W; Tang, Z; Luo, N; Tan, R; Yin. D. Polyoxometalate-based Gemini ionic catalysts for selective oxidation of benzyl alcohol with hydrogen peroxide in water. *Catal. Sci. Technol.*, 2018, **8**, 4463-4473. doi.org/10.1039/C8CY01191E
- S4. Fan, J; Pu, F; Sun, M; Liu, Z. W; Han, Wei, J. F; Shi, X. Y. Immobilized bis-layered ionic liquids/peroxotungstates as an efficient catalyst for selective oxidation of alcohols in neat water. *New J. Chem.*, 2016, **40**, 10498-10503. doi.org/10.1039/C6NJ01476C
- S5. Darvishi, K; Amani, K; Rezaei, M. Preparation, characterization and heterogeneous catalytic applications of GO/Fe<sub>3</sub>O<sub>4</sub>/HPW nanocomposite in chemoselective and green oxidation of alcohols with aqueous H<sub>2</sub>O<sub>2</sub>. *Appl Organometal Chem.* 2018, **32**, 1-14. doi.org/10.1002/aoc.4323
- S6. Dong, X; Zhang, X.; Wu, P.; Zhang, Y.; Liu, B.; Hu, H.; Xue, G. Divanadium-Substituted Phosphotungstate Supported on Magnetic Mesoporous Silica Nanoparticles as Effective and Recyclable Catalysts for the Selective Oxidation of Alcohols. *ChemCatChem* 2016, **8**, 3680-3687. doi.org/10.1002/cctc.201601077
- S7. Leng, Y.; Liu, J.; Jiang, P.; Wang, J. Heteropolyanion-based polymeric hybrids: highly efficient and recyclable catalysts for oxidation of alcohols with H<sub>2</sub>O<sub>2</sub>. *RSC Adv.* 2012, **2**, 11653-11656. doi.org/10.1039/C2RA22348A
- S8. Churipard, S. R.; Kanakikodi, K. S.; Choudhuri J. R.; Maradur. S. P. Polyoxotungstate ([PW<sub>11</sub>O<sub>39</sub>]<sup>7-</sup>) immobilized on mesoporous polymer for selective liquid-phase oxidation of alcohols using H<sub>2</sub>O<sub>2</sub>. *RSC Adv.*, 2020, **10**, 35988-35997. doi.org/10.1039/D0RA07178A
- S9. Chen, G.; Zhou, Y.; Long, Z.; Wang, X.; Li, J.; Wang, J. Mesoporous Polyoxometalate-Based Ionic Hybrid As a Triphasic Catalyst for Oxidation of Benzyl Alcohol with H<sub>2</sub>O<sub>2</sub> on Water. *ACS Appl. Mater. Interfaces* 2014, **6**, 4438–4446. doi.org/10.1021/am5001757
- S10. Bhattacharjee, R. R.; Thangamani, S.; Mal. S. S. A Liquid Derivative of Phosphotungstic Acid as Catalyst for Benzyl Alcohol Oxidation in Water: Facile

- Separation and Stability of Benzaldehyde at Room Temperature. *ChemistrySelect* 2017, **2**, 4368 – 4375. doi.org/10.1002/slct.201700443
- S11. Abednatanzi, S.; Abbasi, A.; Farahani, M. M. Immobilization of catalytically active polyoxotungstate into ionic liquid-modified MIL-100(Fe): A recyclable catalyst for selective oxidation of benzyl alcohol. *Catal. Commun.* 2017, **96**, 6–10. doi.org/10.1016/j.catcom.2017.03.011
- S12. Kashyap, N.; Das, S.; Borah, R. Solvent responsive self-separation behaviour of Brønsted acidic ionic liquid-polyoxometalate hybrid catalysts on H<sub>2</sub>O<sub>2</sub> mediated oxidation of alcohols. *Polyhedron* 2021, **196**, 114993-1145006. doi.org/10.1016/j.poly.2020.114993
- S13. Tong, J.; Su, L.; Li, W.; Wang, W.; Ma, H.; Wang, Q. Hybrids of [C<sub>4</sub>mim]<sub>3+x</sub>PMo<sub>12-x</sub>V<sub>x</sub>O<sub>40</sub>: A new catalyst for oxidation of benzyl alcohol to benzaldehyde in water with greatly improved performances. *Polyhedron* 2016, **115**, 282–287. doi.org/10.1016/j.poly.2016.05.024
- S14. Zheng, W.; Wu, M.; Yang, C.; Chen, Y.; Tan, R.; Yin, D. Alcohols selective oxidation with H<sub>2</sub>O<sub>2</sub> catalyzed by robust heteropolyanions intercalated in ionic liquid-functionalized graphene oxide. *Mater. Chem. Phys.* 2020, **256**, 123681-124688. doi.org/10.1016/j.matchemphys.2020.123681
- S15. Zhang, W. H.; Shen, J. J.; Wu, J.; Liang, X. Y.; Xu, J.; Liu, P.; Xue, B.; Li, Y. X. An amphiphilic graphene oxide-immobilized polyoxometalate-based ionic liquid: A highly efficient triphase transfer catalyst for the selective oxidation of alcohols with aqueous H<sub>2</sub>O<sub>2</sub>. *Mol. Catal.* 2017, **443**, 262-269. doi.org/10.1016/j.mcat.2017.10.018
